# Supplementary material
Source: HighWire-hosted journal article supplement (https://jnm.snmjournals.org/highwire/filestream/95490/field_highwire_adjunct_files/0/219972_Supplemental_Data.pdf)
Supplement: 219972_Supplemental_Data.pdf [file 219972_Supplemental_Data.pdf]

## Determination of Cyclosporine A Concentrations in Blood

The concentration of cyclosporine A in whole blood was determined by high-performance liquid chromatography (HPLC) with minor modifications as described previously (*1*). Briefly, after hemolysis of 1 mL whole blood by the addition of a mixture of zinc sulfate/methanol (65:35, w/v; 2 mL), 50  $\mu$ L (1.0  $\mu$ g) of cyclosporine D (Cayman Chemical, Ann Arbor, MI, USA) was added as the internal standard. After centrifugation (5 min, 3,000 x g), the supernatant was passed through an Oasis HLB 1 cc SPE cartridge (30 mg; Waters Corporation, Milford, MA, USA) which had been equilibrated with 2 mL of methanol and water (pH 3.0), respectively. The column was washed with methanol in water (50%, v/v; 2.3 mL) and heptane (0.5 mL), and cyclosporine A was eluted with ethanol (100%, 300  $\mu$ L). The eluate was mixed with 100  $\mu$ L of water (pH 3.0) and 1 mL of heptane and centrifuged for 5 min at 3,000 x g. An aliquot (80  $\mu$ L) of the aqueous phase was injected onto the HPLC column. HPLC was performed using a Dionex “UltiMate 3000” system (Dionex Corp., Sunnyvale, CA) with UV detection at 205 nm. Chromatographic separation was carried out at 75°C on a Hypersil BDS-C18 column (5  $\mu$ m, 250 x 4.6 mm, Thermo Fisher Scientific, Inc, Waltham, MA), preceded by a Hypersil BDS-C18 pre-column (5  $\mu$ m, 10 x 4.6 mm). The mobile phase consisted of a continuous gradient, mixed from solvent A (acetonitrile in water [35:75, v/v]) and solvent B (acetonitrile in water [85:15, v/v]). The column was equilibrated with 45% solvent B at time 0; after injection of the sample (80  $\mu$ L), the content of solvent B was linearly increased to 93% at 19 min. Subsequently, the percentage of solvent B was decreased to 45% within 2 min, to equilibrate the column for 8 min before application of the next sample. Linearity was tested by assaying drug-free whole blood spiked with 0.1, 0.5, 2.5 and 10  $\mu$ g cyclosporine A. The calibration curve for cyclosporine A in blood was linear over the tested concentration range (correlation coefficient: 0.985). Quantification of cyclosporine A was based on the comparison of cyclosporine A/cyclosporine D ratios.

### **Determination of Parent $^{11}\text{C}$ -metoclopramide in Plasma**

Plasma samples (830  $\mu\text{L}$ ) collected at 5, 10, 20, 30 and 40 min after  $^{11}\text{C}$ -metoclopramide injection were mixed with acetonitrile (600  $\mu\text{L}$ ) and vortexed to precipitate plasma proteins. After addition of water (600  $\mu\text{L}$ ) and phosphate-buffered saline (10-fold concentrate, pH 7.4, 100  $\mu\text{L}$ ) samples were centrifuged (4 min, 15,000  $\times$  g, 4°C) and the protein pellet and supernatant were separately counted in a gamma counter to determine the recovery of radioactivity, which was for the 10 min time point  $87 \pm 2\%$  for the baseline scan and  $88 \pm 2\%$  for the CsA scan ( $n = 9$ ). The supernatant (1.5 mL) was then injected into the HPLC system. An Atlantis T3 OBD HPLC column (250  $\times$  10 mm, 10  $\mu\text{m}$ , Waters, Austria) equipped with a pre-column (Atlantis T3 Prep Guard Cartridge, 10  $\times$  10 mm, 10  $\mu\text{m}$ ) was eluted with a mixture of 25 mM aqueous ammonium acetate (solvent A) and acetonitrile (solvent B). A linear gradient from 20% to 30% of solvent B over 5.5 min (total run length: 10 min) was applied to the column at a flow rate of 5 mL/min. On this HPLC system  $^{11}\text{C}$ -metoclopramide and its radiolabeled metabolites eluted with retention times of approximately 8.5 and 4 min, respectively. HPLC eluates were collected in 1-min fractions, which were counted for radioactivity in a gamma counter. The measured fractions were corrected for radioactive decay to determine the percentage of unmetabolized  $^{11}\text{C}$ -metoclopramide in plasma at different time points.

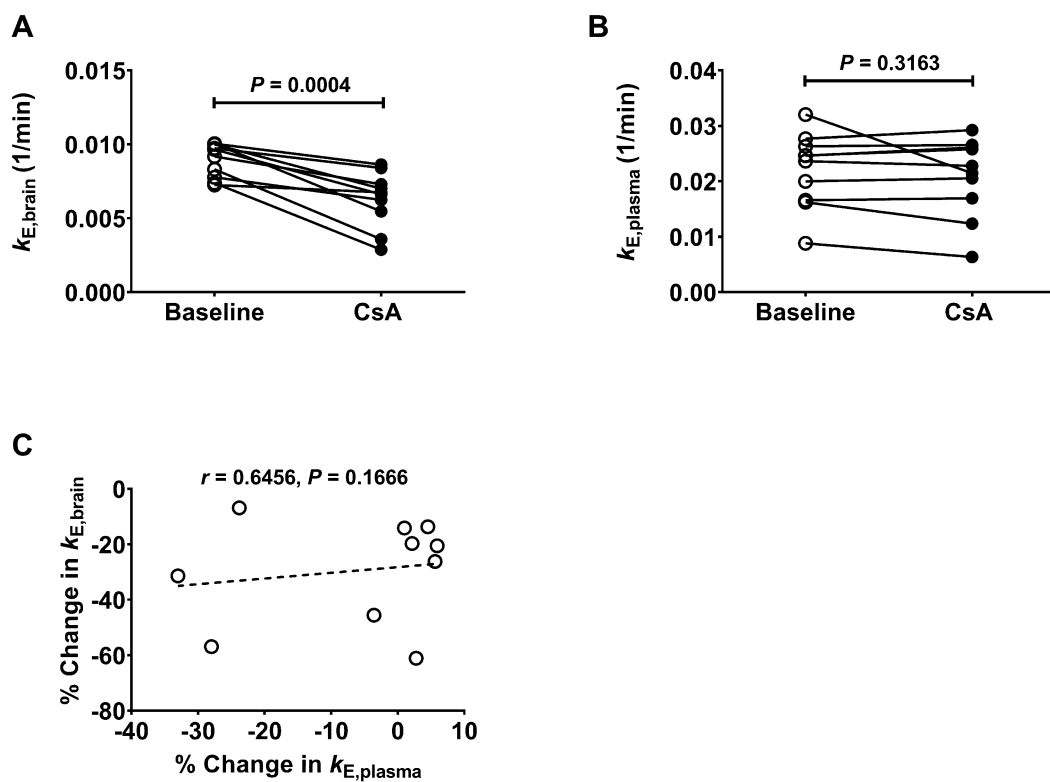

**SUPPLEMENTAL FIGURE 1.** Individual  $k_{E,brain}$  values in whole brain grey matter (A) and  $k_{E,plasma}$  values (B) for scans without (baseline) and with CsA infusion. Shown  $P$  values are from two sided, paired t-test. Correlation of percentage change in  $k_{E,brain}$  and  $k_{E,plasma}$  in response to CsA. (C) ( $r$  = Pearson correlation coefficient).

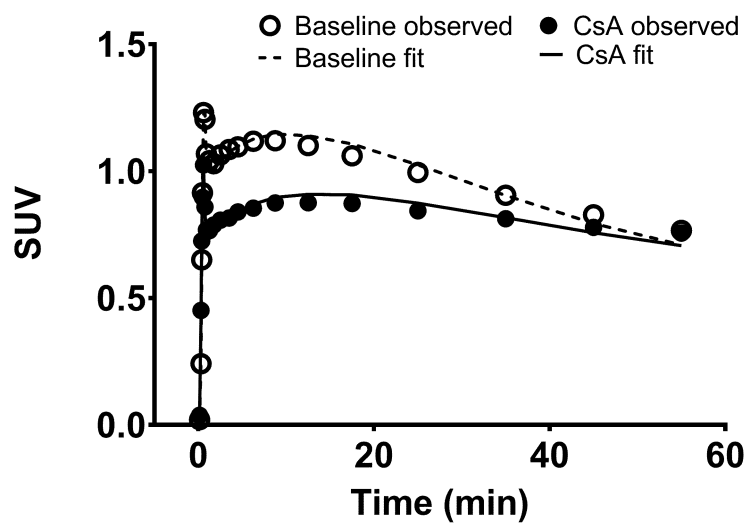

**SUPPLEMENTAL FIGURE 2.** Time-activity curves in whole brain grey matter for scan without (baseline) and with CsA infusion and fits obtained with the 1T2K model for one representative subject.

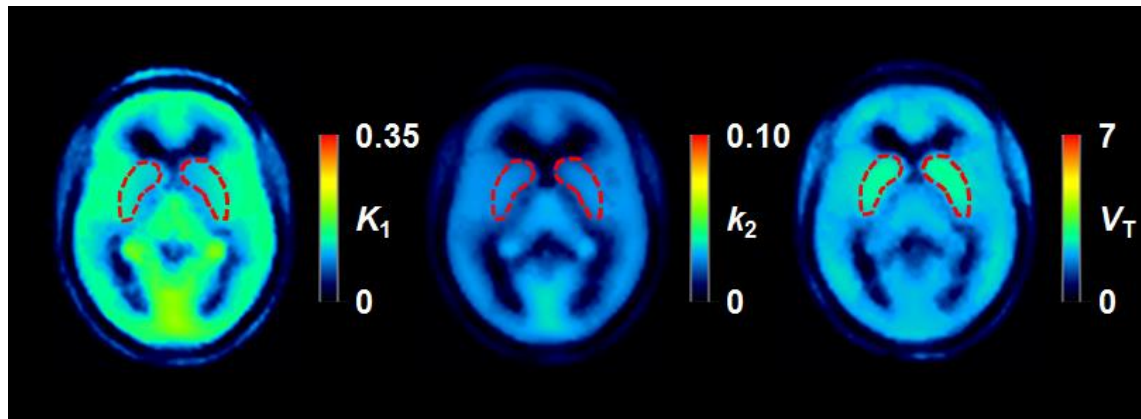

**SUPPLEMENTAL FIGURE 3.** Mean parametric  $K_1$ ,  $k_2$  and  $V_T$  images ( $n = 10$ ) in Talairach space for baseline scans without CsA infusion. The basal ganglia, a dopamine D<sub>2</sub> receptor rich structure containing the ROIs caudate nucleus and putamen, are marked with a red broken line.

# SUPPLEMENTAL TABLE 1

Descriptive Pharmacokinetic Parameters for Different Brain Regions for Scans without  
(Baseline) and with CsA Infusion

| Brain region                  | Condition | C <sub>max</sub><br>(SUV) | T <sub>max</sub><br>(min) | C <sub>55 min</sub><br>(SUV) | AUC<br>(SUV.min) | k <sub>E,brain</sub><br>(1/min) |
|-------------------------------|-----------|---------------------------|---------------------------|------------------------------|------------------|---------------------------------|
| Whole brain grey matter       | Baseline  | 1.06 ± 0.19               | 7.0 ± 1.2                 | 0.67 ± 0.10                  | 47 ± 8           | 0.009 ± 0.001                   |
|                               | CsA       | 0.97 ± 0.26               | 10.5 ± 3.2*               | 0.75 ±<br>0.16*              | 47 ± 12          | 0.006 ±<br>0.002*               |
| White matter                  | Baseline  | 0.61 ± 0.16               | 14.8 ± 6.4                | 0.50 ± 0.19                  | 33 ± 5           | 0.005 ± 0.004                   |
|                               | CsA       | 0.62 ± 0.15               | 26.8 ± 12.3*              | 0.59 ± 0.12                  | 32 ± 8           | 0.001 ±<br>0.002*               |
| Frontal lobe mid gyrus        | Baseline  | 1.07 ± 0.19               | 6.7 ± 1.6                 | 0.67 ± 0.11                  | 48 ± 8           | 0.009 ± 0.001                   |
|                               | CsA       | 0.99 ± 0.26               | 13.3 ± 5.3*               | 0.76 ±<br>0.16*              | 48 ± 11          | 0.006 ±<br>0.002*               |
| Putamen                       | Baseline  | 1.21 ± 0.24               | 9.5 ± 2.5                 | 0.83 ± 0.18                  | 60 ± 11          | 0.010 ± 0.002                   |
|                               | CsA       | 1.15 ± 0.33               | 23.3 ± 18.5*              | 0.94 ± 0.24                  | 57 ± 16          | 0.006 ±<br>0.003*               |
| Caudate nucleus               | Baseline  | 0.97 ± 0.17               | 11.6 ± 3.1                | 0.70 ± 0.16                  | 46 ± 9           | 0.007 ± 0.001                   |
|                               | CsA       | 0.90 ± 0.19               | 21.3 ± 14.6               | 0.78 ± 0.17                  | 45 ± 10          | 0.004 ±<br>0.002*               |
| Occipital lobe medial<br>part | Baseline  | 1.08 ± 0.18               | 6.3 ± 1.6                 | 0.69 ± 0.10                  | 49 ± 8           | 0.009 ± 0.001                   |
|                               | CsA       | 1.02 ± 0.27               | 9.3 ± 3.5*                | 0.78 ±<br>0.16*              | 49 ± 11          | 0.006 ±<br>0.002*               |
| Cerebellum                    | Baseline  | 1.15 ± 0.21               | 4.4 ± 1.5                 | 0.61 ± 0.09                  | 47 ± 8           | 0.011 ± 0.001                   |
|                               | CsA       | 1.04 ± 0.30               | 6.5 ± 2.5*                | 0.69 ±<br>0.15*              | 47 ± 12          | 0.008 ±<br>0.002*               |
| Pituitary gland               | Baseline  | 4.06 ± 0.64               | 2.0 ± 0.9                 | 2.20 ± 0.63                  | 160 ± 270        | 0.009 ± 0.007                   |
|                               | CsA       | 3.61 ± 0.50               | 2.5 ± 1.5                 | 2.33 ± 0.57                  | 149 ± 28         | 0.007 ± 0.010                   |

Values are reported as mean ± standard deviation

C<sub>max</sub>, maximum concentration; T<sub>max</sub>, time of C<sub>max</sub>; AUC, area under the time-activity curve; k<sub>E,brain</sub>, elimination slope for radioactivity washout from the brain

\* *P* < 0.05 for comparison of CsA scan with baseline scan using a two sided, paired t-test

## SUPPLEMENTAL TABLE 2

Outcome Parameters of the Reversible 1T2K Model in Different Brain Regions for Scans  
without (Baseline) and with CsA Infusion

| Brain region                  | Condition | $K_1$<br>(mL/(cm <sup>3</sup> .min)) | $k_2$<br>(1/min)                   | $V_T$<br>(mL/cm <sup>3</sup> ) | $V_b$<br>(mL)         | $V_T / f_P$            |
|-------------------------------|-----------|--------------------------------------|------------------------------------|--------------------------------|-----------------------|------------------------|
| Whole brain<br>grey matter    | Baseline  | 0.092±0.014<br>(2±1)                 | 0.044±0.005<br>(4±1)               | 2.1±0.3 (3±1)                  | 0.043±0.008<br>(4±1)  | 10.4±2.7               |
|                               | CsA       | 0.099±0.012<br>(2±0)                 | 0.037±0.004<br>(4±1)*              | 2.7±0.4<br>(3±1)*              | 0.042±0.006<br>(4±1)  | 11.1±3.8               |
|                               |           |                                      |                                    |                                |                       |                        |
| White matter                  | Baseline  | 0.027±0.004<br>(11±2) <sup>†</sup>   | 0.092±0.015<br>(21±3) <sup>†</sup> | 0.3±0.0<br>(15±2) <sup>†</sup> | 0.026±0.004<br>(8±1)  | 1.5±0.5 <sup>†</sup>   |
|                               | CsA       | 0.051±0.005<br>(3±1)*                | 0.022±0.003<br>(8±3)* <sup>‡</sup> | 2.4±0.4<br>(6±2)*              | 0.023±0.003<br>(6±2)* | 9.7±3.4*               |
|                               |           |                                      |                                    |                                |                       |                        |
| Frontal lobe mid<br>gyrus     | Baseline  | 0.087±0.010<br>(2±1)                 | 0.043±0.005<br>(4±3)               | 2.0±0.3 (3±2)                  | 0.032±0.004<br>(5±3)  | 10.1±3.1               |
|                               | CsA       | 0.097±0.009<br>(3±1)*                | 0.036±0.005<br>(5±3)*              | 2.8±0.5<br>(3±2)*              | 0.032±0.004<br>(6±4)  | 11.3±3.3*              |
|                               |           |                                      |                                    |                                |                       |                        |
| Putamen                       | Baseline  | 0.091±0.015<br>(2±1)                 | 0.035±0.003<br>(5±2)               | 2.6±0.4 (4±2)                  | 0.037±0.007<br>(3±1)  | 12.9±3.2               |
|                               | CsA       | 0.106 ± 0.019<br>(3±1)*              | 0.029±0.005<br>(5±3)*              | 3.7±0.7<br>(5±3)*              | 0.031±0.005<br>(3±1)* | 14.9±4.2*              |
|                               |           |                                      |                                    |                                |                       |                        |
| Caudate nucleus               | Baseline  | 0.069±0.009<br>(2±1)                 | 0.032±0.005<br>(6±3) <sup>†</sup>  | 2.2±0.5 (4±2)                  | 0.029±0.007<br>(3±1)  | 10.9±3.3               |
|                               | CsA       | 0.079 ± 0.011<br>(2±1)*              | 0.026± 0.005<br>(5±2)*             | 3.1±0.5<br>(4±2)*              | 0.025±0.005<br>(3±1)  | 12.6±3.5*              |
|                               |           |                                      |                                    |                                |                       |                        |
| Occipital lobe<br>medial part | Baseline  | 0.089±0.009<br>(2±0)                 | 0.043±0.004<br>(4±2)               | 2.1±0.3 (4±1)                  | 0.052±0.007<br>(4±1)  | 10.4±3.3               |
|                               | CsA       | 0.104±0.009<br>(3±1)*                | 0.037±0.005<br>(6±3)*              | 2.8±0.5<br>(4±2)*              | 0.040±0.012<br>(3±1)  | 11.6±4.1*              |
|                               |           |                                      |                                    |                                |                       |                        |
| Cerebellum                    | Baseline  | 0.098±0.010<br>(2±1)                 | 0.053±0.006<br>(4±1)               | 1.9±0.3 (3±1)                  | 0.045±0.011<br>(4±1)  | 9.4±3.0                |
|                               | CsA       | 0.116±0.016*<br>(3±1)                | 0.047±0.008<br>(5±2)*              | 2.5±0.4<br>(4±2%)*             | 0.042±0.006<br>(5±1)* | 10.3±3.7               |
|                               |           |                                      |                                    |                                |                       |                        |
| Pituitary gland               | Baseline  | 0.384±0.055<br>(5±2) <sup>†</sup>    | 0.056±0.014<br>(12±3) <sup>†</sup> | 7.3±2.0<br>(9±2) <sup>†</sup>  | 0.144±0.056<br>(13±7) | 37.3±15.2 <sup>†</sup> |
|                               | CsA       | 0.454±0.126<br>(7±3) <sup>‡</sup>    | 0.056±0.023<br>(15±6) <sup>‡</sup> | 9.0±3.0<br>(11±5) <sup>‡</sup> | 0.148±0.103<br>(12±6) | 36.9±15.6 <sup>‡</sup> |
|                               |           |                                      |                                    |                                |                       |                        |

Values are reported as mean ± standard deviation. The value in parentheses represents the precision of parameter estimates (expressed as their coefficient of variation in percent).

$K_1$  (mL/(cm<sup>3</sup>.min)), rate constant for radioactivity transfer from plasma into brain;  $k_2$  (1/min), rate constant for radioactivity transfer from brain into plasma;  $V_T$  (mL/cm<sup>3</sup>), total volume of distribution;  $V_T / f_P$ ,  $V_T$  over the free fraction of <sup>11</sup>C-metoclopramide in plasma;  $V_b$ , fractional arterial blood volume in the brain

\*  $P < 0.05$  for comparison of CsA scan with baseline scan using a two sided, paired t-test

<sup>†</sup>  $P < 0.05$  for comparison with whole brain grey matter region in baseline scans using one-way ANOVA followed by a Tukey's multiple comparison test

<sup>‡</sup>  $P < 0.05$  for comparison with whole brain grey matter region in CsA scans using one-way ANOVA followed by a Tukey's multiple comparison test



## **SUPPLEMENTAL REFERENCES**

1. Hamwi A, Salomon A, Steinbrugger R, Fritzer-Szekeres M, Jager W, Szekeres T. Cyclosporine metabolism in patients after kidney, bone marrow, heart-lung, and liver transplantation in the early and late posttransplant periods. *Am J Clin Pathol*. 2000;114:536-543.
